# Supplementary material for: Looking for the missing rich: tracing the top tail of the wealth distribution
Source: Springer Nature journal article supplement (doi:10.1007/s10797-019-09578-1), 2019-11-08
Supplement: MOESM1 [file 10797_2019_9578_MOESM1_ESM.pdf]

Bach, Stefan; Thiemann, Andreas; Zucco, Aline

**Article — Published Version**

## Looking for the missing rich: tracing the top tail of the wealth distribution

International Tax and Public Finance

**Provided in Cooperation with:**

German Institute for Economic Research (DIW Berlin)

*Suggested Citation:* Bach, Stefan; Thiemann, Andreas; Zucco, Aline (2019) : Looking for the missing rich: tracing the top tail of the wealth distribution, International Tax and Public Finance, ISSN 0927-5940, Springer, Berlin, Vol. 26, Iss. 6, pp. 1234-1258, <https://doi.org/10.1007/s10797-019-09578-1> , <https://link.springer.com/article/10.1007/s10797-019-09578-1>

This Version is available at:

<https://hdl.handle.net/10419/215786>

**Standard-Nutzungsbedingungen:**

Die Dokumente auf EconStor dürfen zu eigenen wissenschaftlichen Zwecken und zum Privatgebrauch gespeichert und kopiert werden.

Sie dürfen die Dokumente nicht für öffentliche oder kommerzielle Zwecke vervielfältigen, öffentlich ausstellen, öffentlich zugänglich machen, vertreiben oder anderweitig nutzen.

Sofern die Verfasser die Dokumente unter Open-Content-Lizenzen (insbesondere CC-Lizenzen) zur Verfügung gestellt haben sollten, gelten abweichend von diesen Nutzungsbedingungen die in der dort genannten Lizenz gewährten Nutzungsrechte.

**Terms of use:**

*Documents in EconStor may be saved and copied for your personal and scholarly purposes.*

*You are not to copy documents for public or commercial purposes, to exhibit the documents publicly, to make them publicly available on the internet, or to distribute or otherwise use the documents in public.*

*If the documents have been made available under an Open Content Licence (especially Creative Commons Licences), you may exercise further usage rights as specified in the indicated licence.*

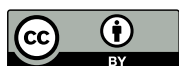

<http://creativecommons.org/licenses/by/4.0/>

# Online Appendix: Looking for the missing rich: Tracing the top tail of the wealth distribution

October, 2019

## Contents

|   |                                                                     |    |
|---|---------------------------------------------------------------------|----|
| 1 | Tail wealth distributions by rich list and minimum wealth           | 2  |
| 2 | Adjusted tail wealth distributions                                  | 8  |
| 3 | Wealth distribution: Distributional tables                          | 11 |
| 4 | Aggregate statistics on assets and liabilities                      | 15 |
| 5 | Construction of an adjusted micro data base for the wealth top tail | 21 |

# 1 Tail wealth distributions by rich list and minimum wealth

Figure 1: Tail wealth distribution by rich list and minimum wealth, Germany, first wave of the HFCS

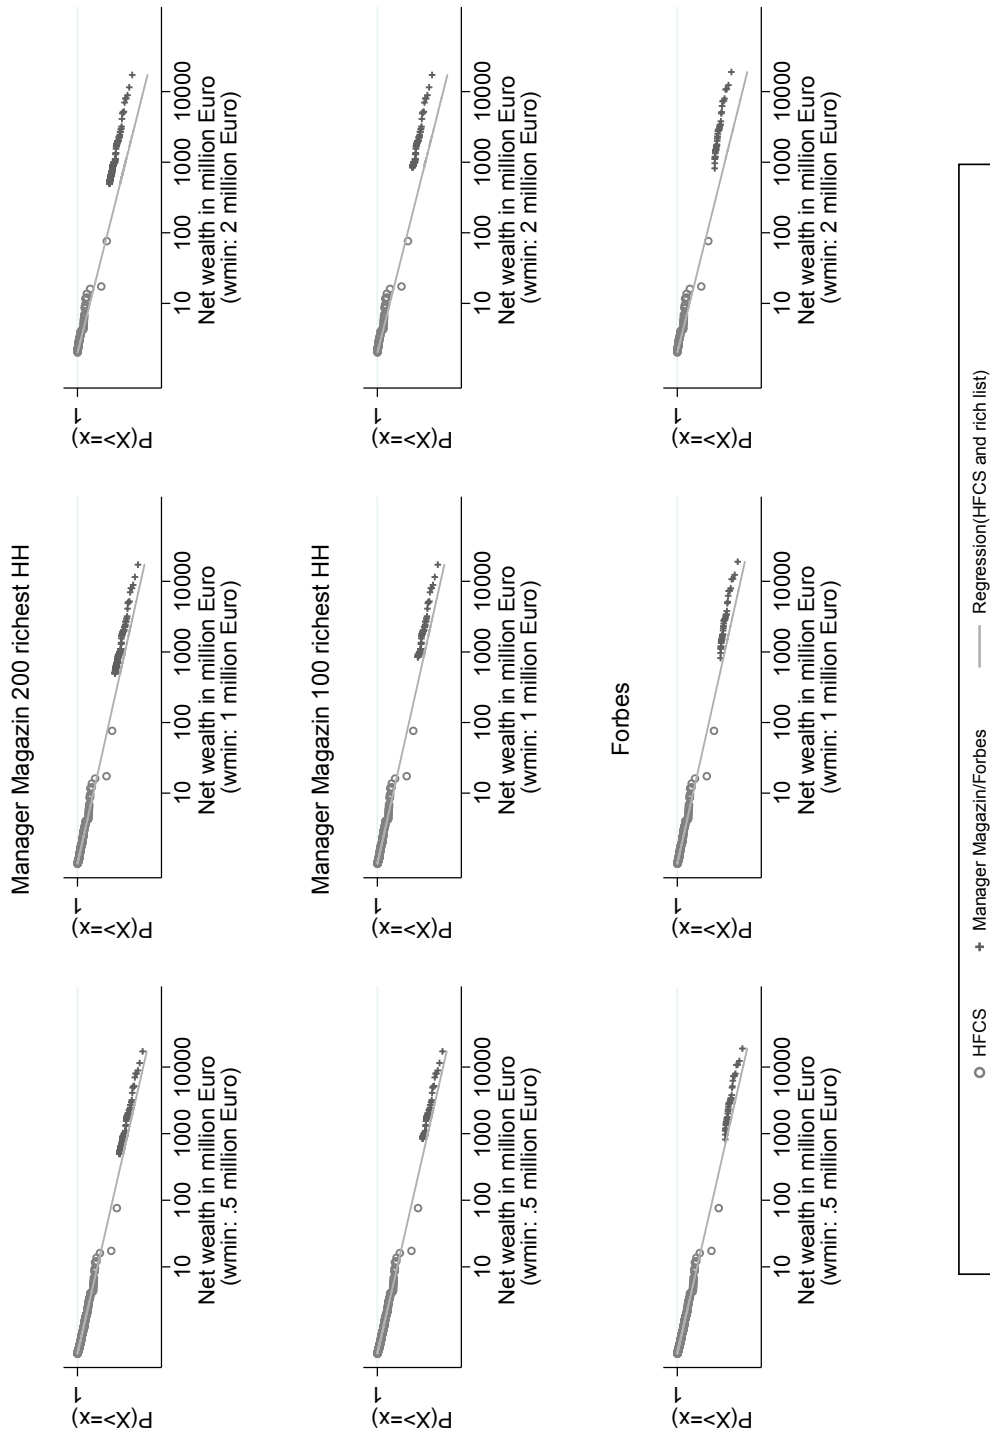

Source: HFCS (first wave), Manager magazin (2011) and Forbes (2011); own calculations.

Figure 2: Tail wealth distribution by rich list and minimum wealth, Germany, second wave of the HFCS

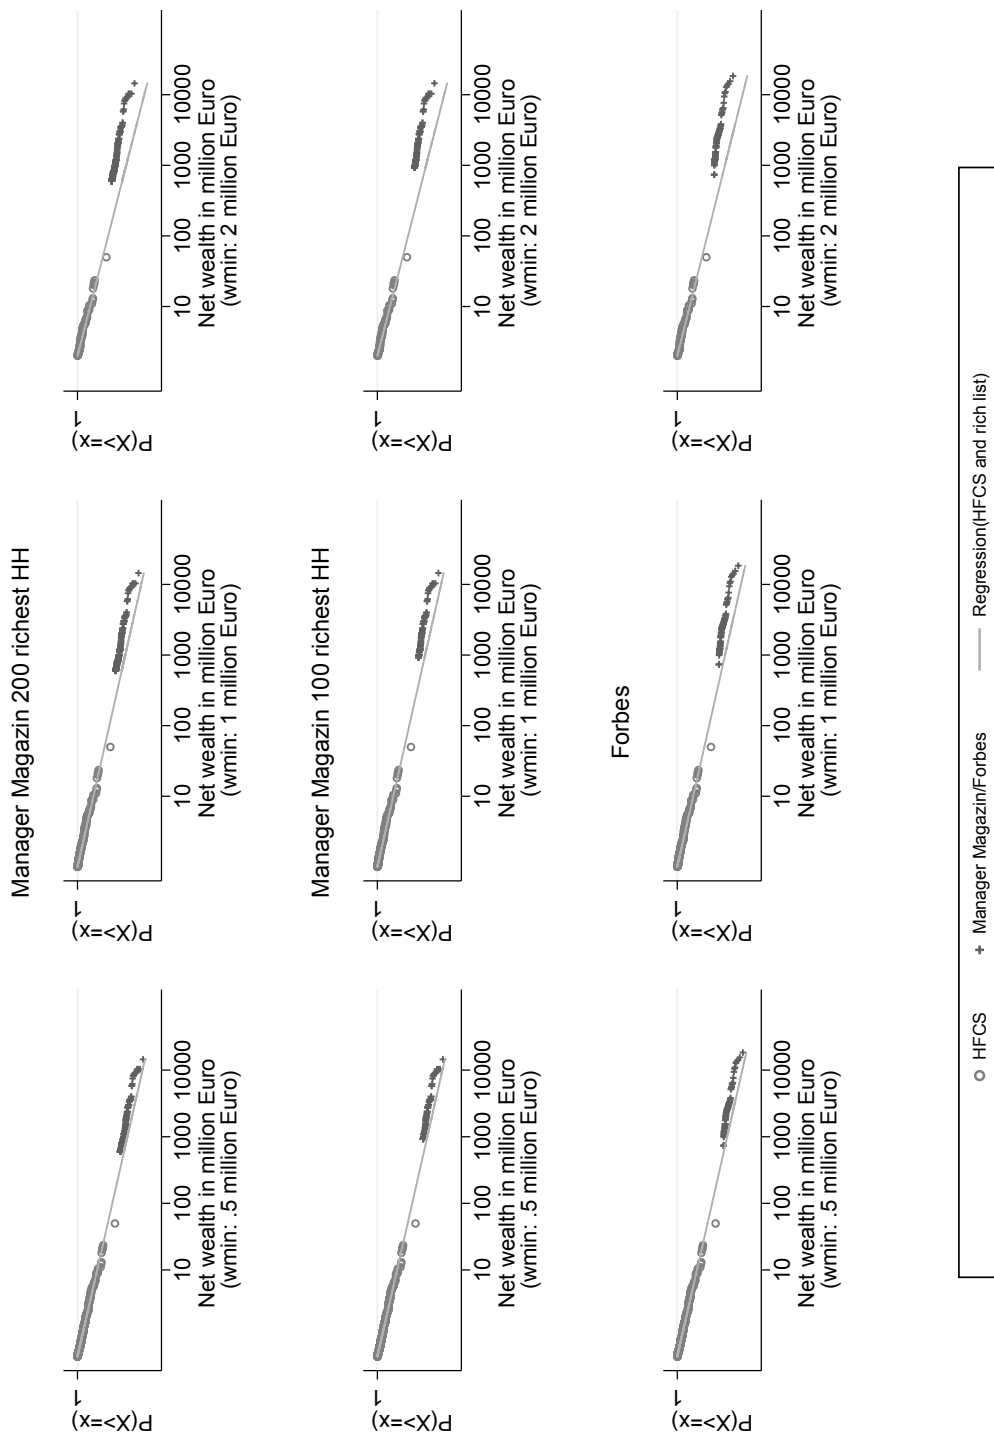

Source: HFCS (second wave), Manager magazin (2014) and Forbes (2014); own calculations.

Figure 3: Tail wealth distribution by rich list and minimum wealth, France, first wave of the HFCS

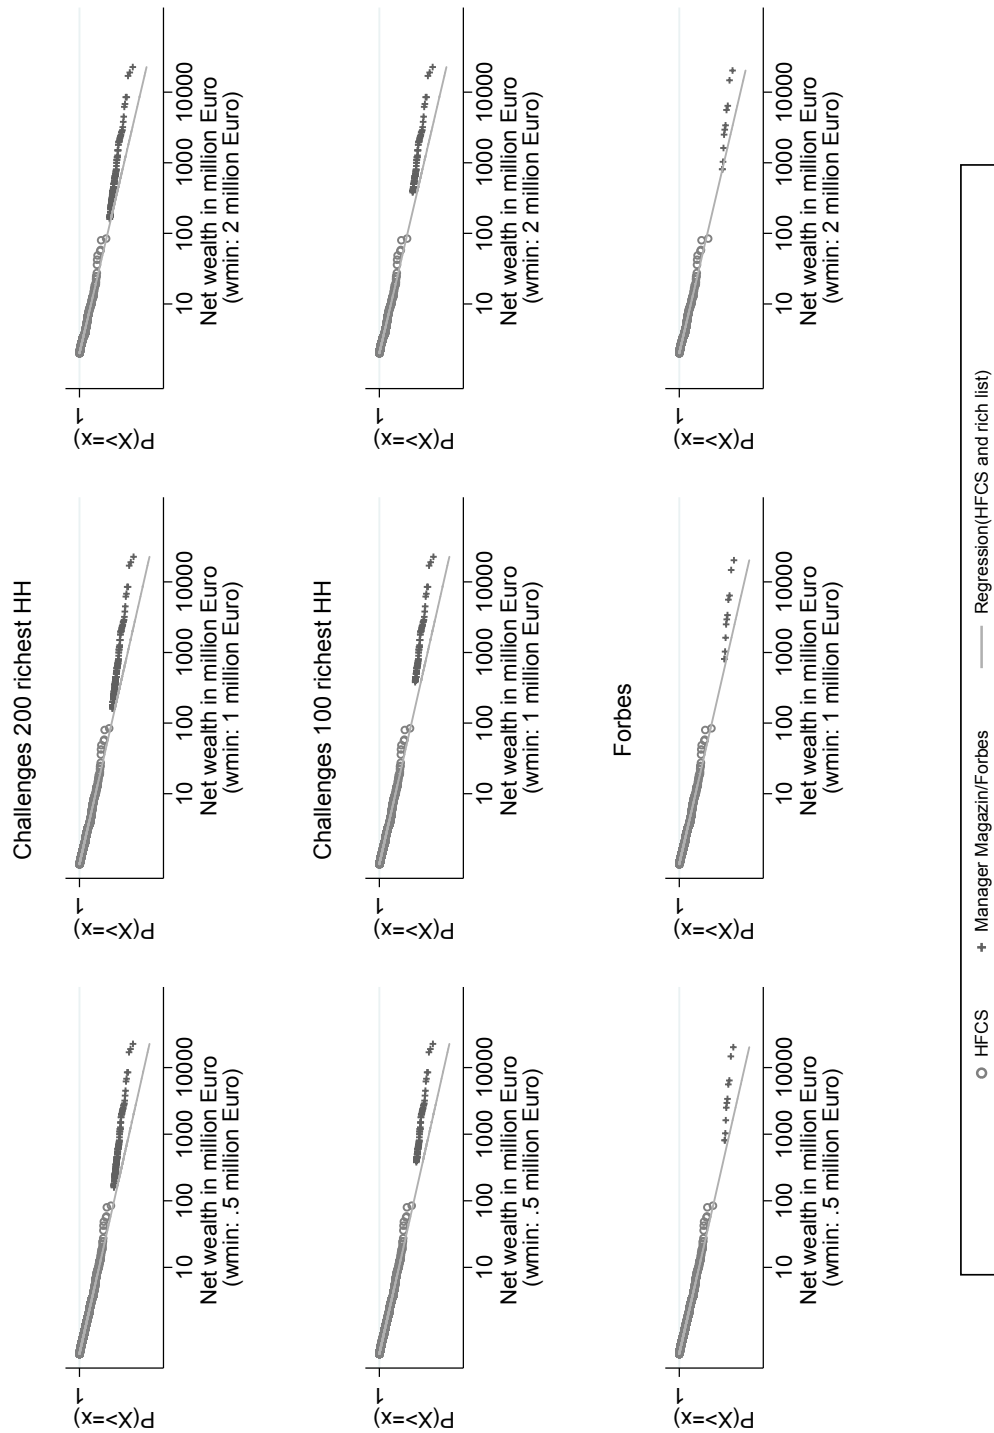

Source: HFCS (first wave), Challenges (2010) and Forbes (2010); own calculations.

Figure 4: Tail wealth distribution by rich list and minimum wealth, France, second wave of the HFCS

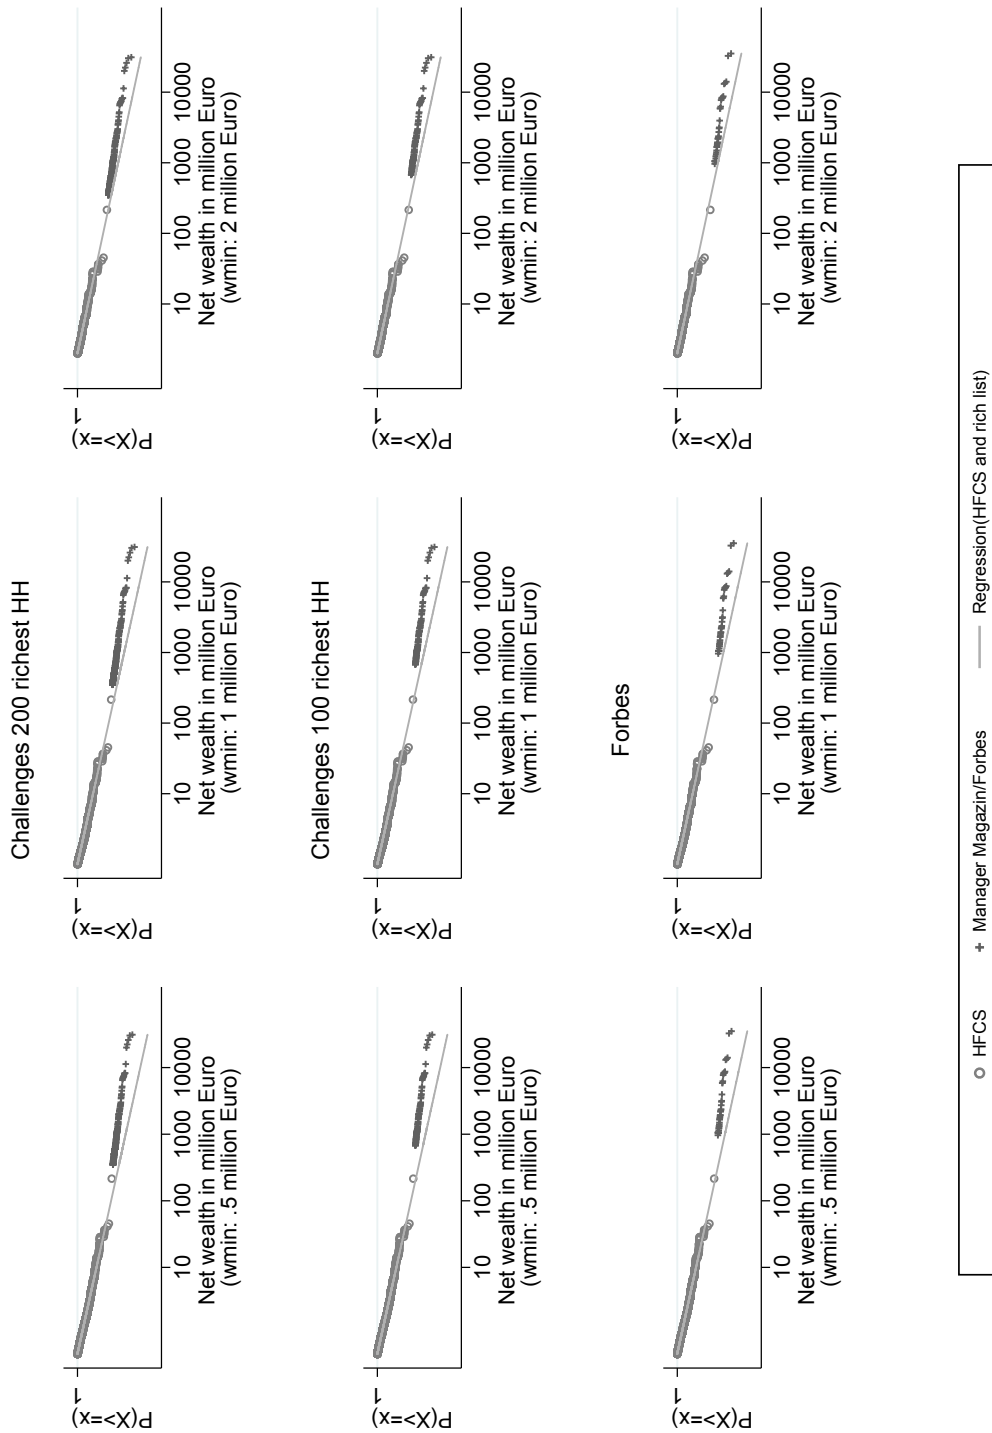

Source: HFCS (second wave), Challenges (2015) and Forbes (2015); own calculations.

Figure 5: Tail wealth distribution by rich list and minimum wealth, Spain, first wave of the HFCS

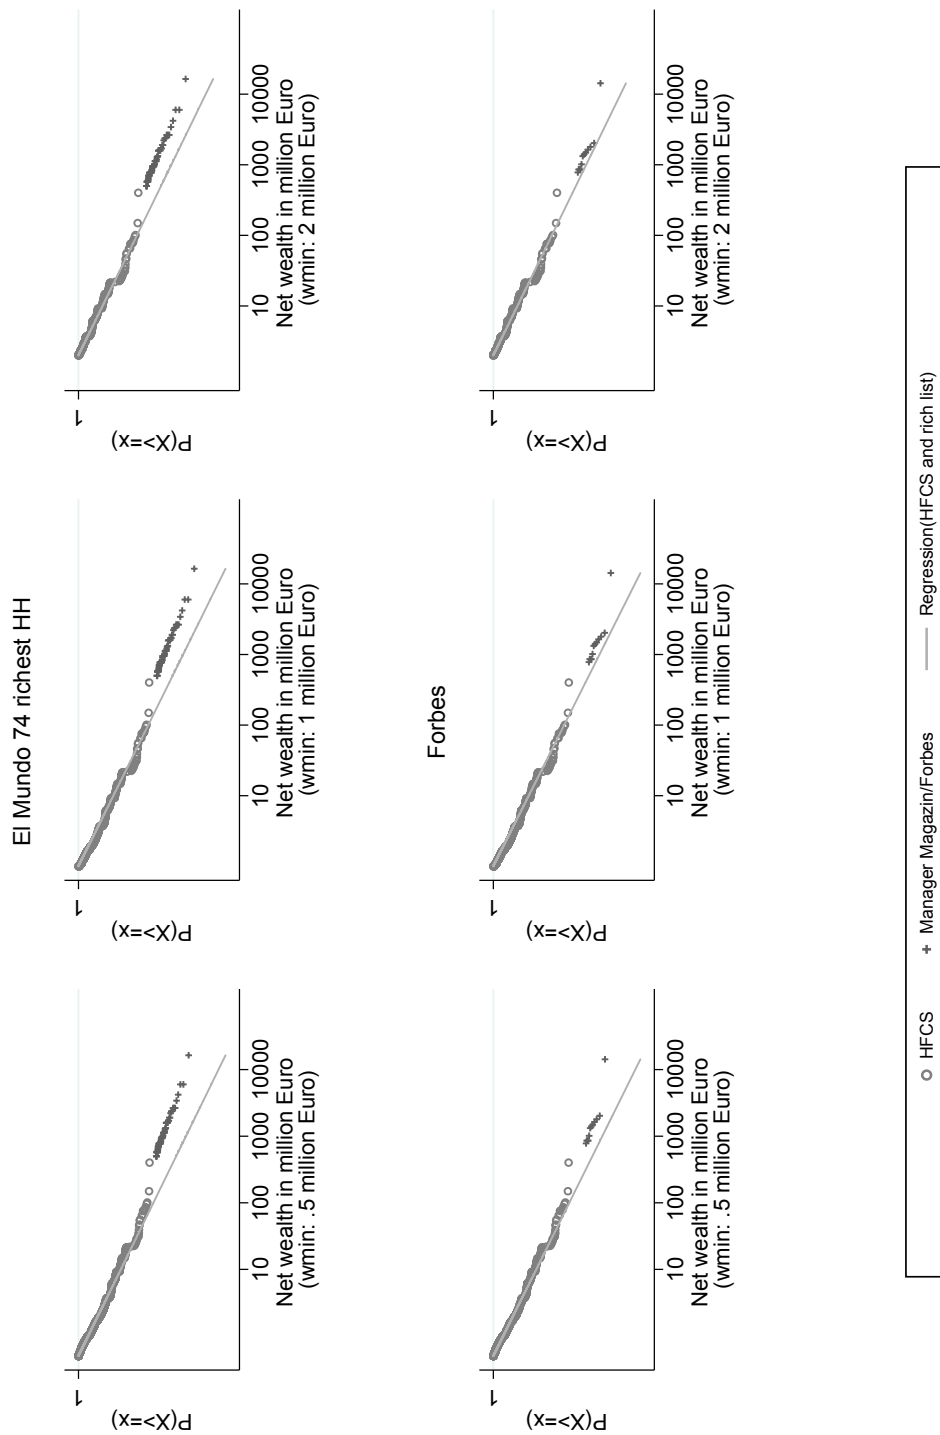

Source: HFCS (first wave), El Mundo (2009) and Forbes (2009); own calculations.

Figure 6: Tail wealth distribution by rich list and minimum wealth, Spain, second wave of the HFCS

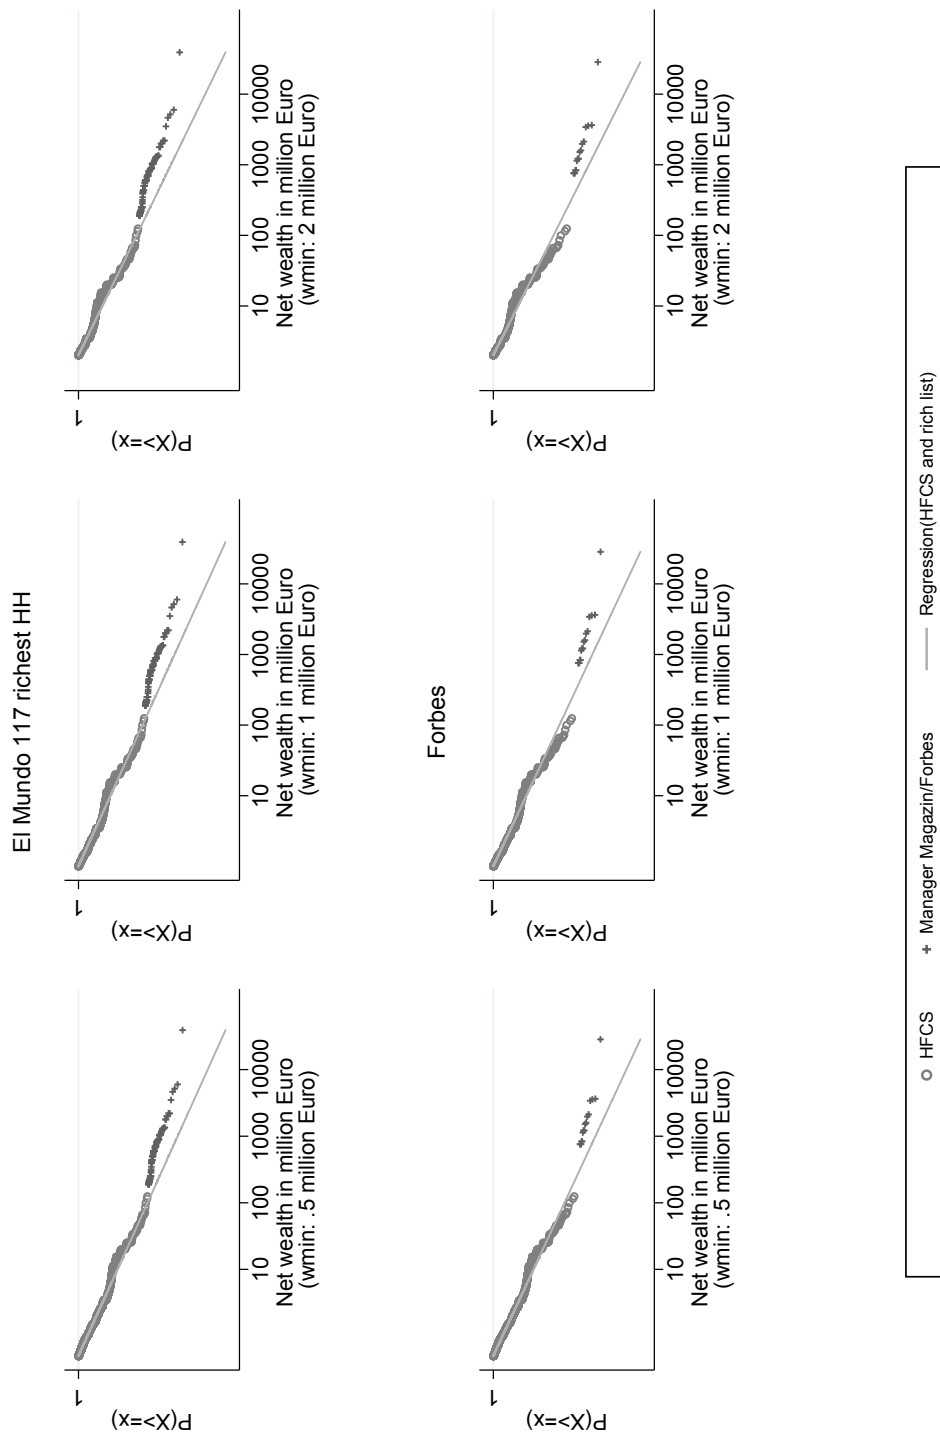

Source: HFCS (second wave), El Mundo (2012) and Forbes (2012); own calculations.



## 2 Adjusted tail wealth distributions

Figure 7: Adjusted tail wealth distribution, Germany - first wave of the HFCS

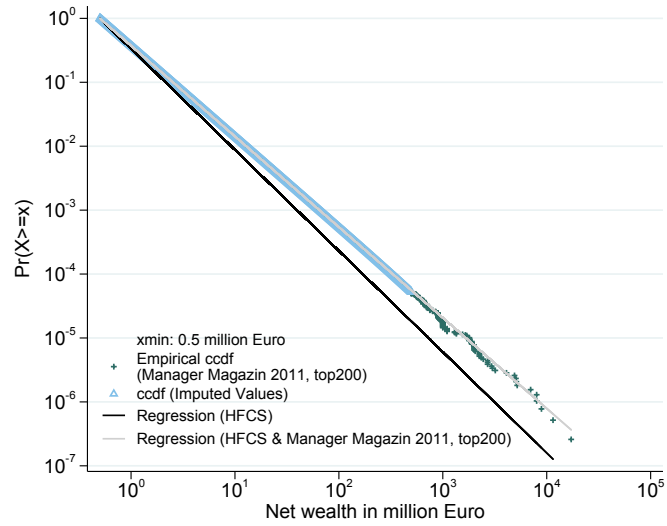

Source: HFCS (first wave), Manager magazin (2011) and Forbes (2011); own calculations.

Figure 8: Adjusted tail wealth distribution, Germany - second wave of the HFCS

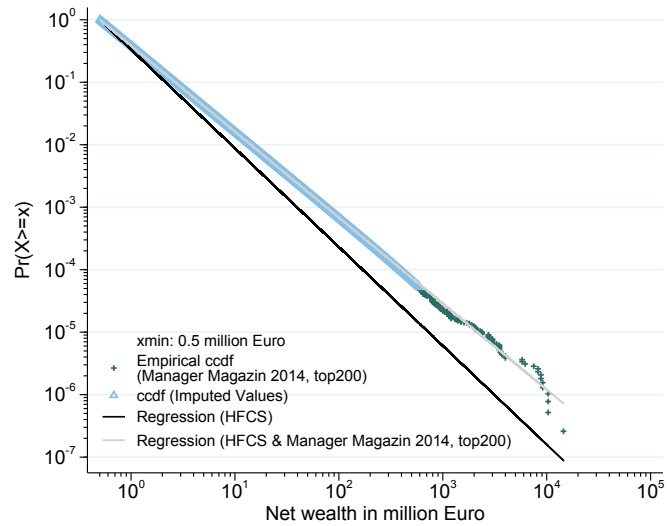

Source: HFCS (second wave), Manager magazin (2014) and Forbes (2014); own calculations.

Figure 9: Adjusted tail wealth distribution, France - first wave of the HFCS

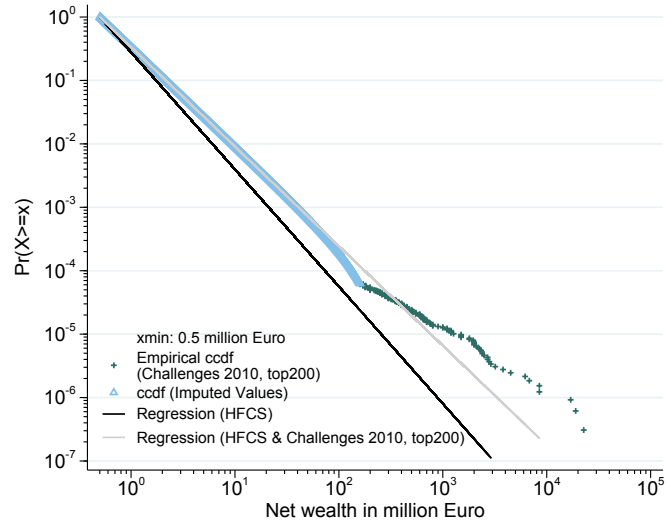

Source: HFCS (first wave), Challenges (2010) and Forbes (2010); own calculations.

Figure 10: Adjusted tail wealth distribution, France - second wave of the HFCS

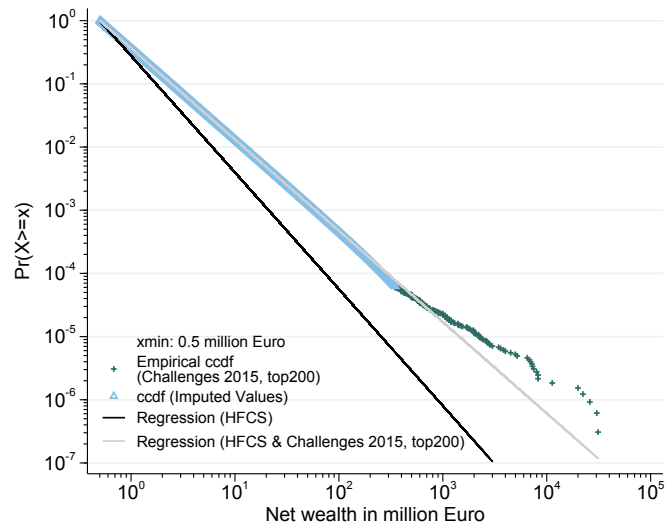

Source: HFCS (second wave), Challenges (2015) and Forbes (2015); own calculations.

Figure 11: Adjusted tail wealth distribution, Spain - first wave of the HFCS

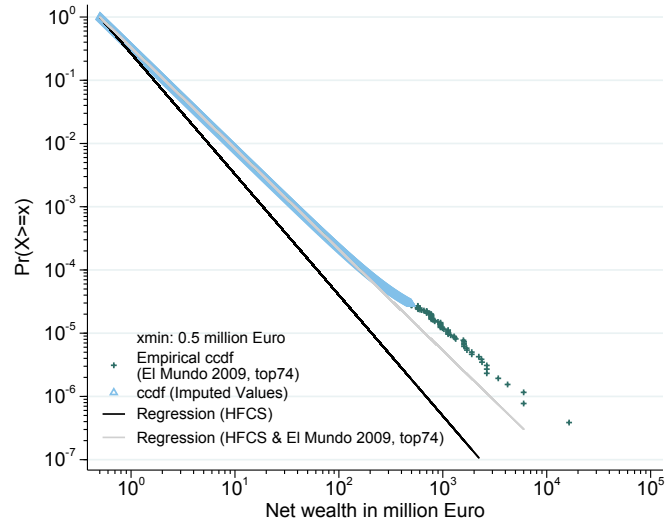

Source: HFCS (first wave), El Mundo (2009) and Forbes (2009); own calculations.

Figure 12: Adjusted tail wealth distribution, Spain - second wave of the HFCS

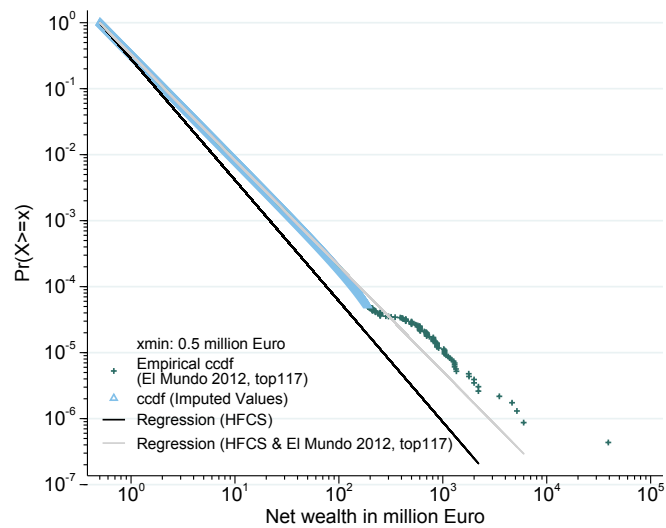

Source: HFCS (second wave), El Mundo (2012) and Forbes (2012); own calculations.

### 3 Wealth distribution: Distributional tables

Table 1: The distribution of household net wealth in Germany, first wave of the HFCS (2010/2011)

| Fractiles household net wealth | Database HFCS        |            |       |       | Database HFCS including imputed top wealth distribution |            |       |       |
|--------------------------------|----------------------|------------|-------|-------|---------------------------------------------------------|------------|-------|-------|
|                                | Percentile 1000 Euro | bill. Euro | Total | %     | Percentile 1000 Euro                                    | bill. Euro | Total | %     |
| 1st - 5th decile               | \                    | 217        |       | 2.8   | \                                                       | 217        |       | 2.4   |
| 6th decile                     | 51                   | 290        |       | 3.7   | 51                                                      | 290        |       | 3.3   |
| 7th decile                     | 97                   | 495        |       | 6.4   | 97                                                      | 495        |       | 5.4   |
| 8th decile                     | 163                  | 837        |       | 10.8  | 163                                                     | 837        |       | 9.2   |
| 9th decile                     | 261                  | 1,322      |       | 17.1  | 261                                                     | 1,322      |       | 14.5  |
| 10th decile                    | 442                  | 4,582      |       | 59.2  | 442                                                     | 5,973      |       | 65.4  |
| Total                          | \                    | 7,743      |       | 100.0 | \                                                       | 9,134      |       | 100.0 |
| Top 5%                         | 661                  | 3,532      |       | 45.6  | 714                                                     | 4,885      |       | 53.5  |
| Top 1%                         | 1,929                | 1,882      |       | 24.3  | 2,261                                                   | 3,057      |       | 33.5  |
| Top 0.1%                       | 13,581               | 306        |       | 3.9   | 11,739                                                  | 1,544      |       | 16.9  |
| Gini coefficient               |                      | 0.7444     |       |       |                                                         | 0.7814     |       |       |
| Entropy meas. <sup>a)</sup>    |                      |            |       |       |                                                         |            |       |       |
| GE(1)                          |                      | 1.2867     |       |       |                                                         | 1.8451     |       |       |
| GE(2)                          |                      | 5.5961     |       |       |                                                         | 271.8905   |       |       |

Note: The imputation of the top wealth relies on the approach described in section 3. We use the 200 richest entries of the *manager magazin* 2011 and assume a  $w_{min}$  of 0.5 million Euro.

a) GE(1) is the Theil index, and GE(2) is half of the square of the coefficient of variation.

Source: HFCS (First wave), Manager magazin (2011), own calculations.

Table 2: The distribution of household net wealth in Germany, second wave of the HFCS (2014)

| Fractiles household net wealth | Database HFCS        |            |       |       | Database HFCS including imputed top wealth distribution |            |       |       |
|--------------------------------|----------------------|------------|-------|-------|---------------------------------------------------------|------------|-------|-------|
|                                | Percentile 1000 Euro | bill. Euro | Total | %     | Percentile 1000 Euro                                    | bill. Euro | Total | %     |
| 1st - 5th decile               | \                    | 214        |       | 2.5   | \                                                       | 214        |       | 2.1   |
| 6th decile                     | 61                   | 335        |       | 3.9   | 61                                                      | 335        |       | 3.3   |
| 7th decile                     | 112                  | 557        |       | 6.5   | 112                                                     | 557        |       | 5.5   |
| 8th decile                     | 175                  | 893        |       | 10.5  | 175                                                     | 893        |       | 8.8   |
| 9th decile                     | 274                  | 1,422      |       | 16.7  | 274                                                     | 1,422      |       | 14.0  |
| 10th decile                    | 469                  | 5,080      |       | 59.8  | 469                                                     | 6,718      |       | 66.3  |
| Total                          | \                    | 8,500      |       | 100.0 | \                                                       | 10,138     |       | 100.0 |
| Top 5%                         | 727                  | 3,932      |       | 46.3  | 781                                                     | 5,535      |       | 54.6  |
| Top 1%                         | 2,320                | 2,010      |       | 23.6  | 2,511                                                   | 3,520      |       | 34.7  |
| Top 0.1%                       | 8,864                | 531        |       | 6.3   | 13,329                                                  | 1,823      |       | 18.0  |
| Gini coefficient               |                      | 0.7477     |       |       |                                                         | 0.7870     |       |       |
| Entropy meas. <sup>a)</sup>    |                      |            |       |       |                                                         |            |       |       |
| GE(1)                          |                      | 1.2865     |       |       |                                                         | 1.9326     |       |       |
| GE(2)                          |                      | 5.2522     |       |       |                                                         | 326.9958   |       |       |

Note: The imputation of the top wealth relies on the approach described in section 3. We use the 200 richest entries of the *manager magazin* 2014 and assume a  $w_{min}$  of 0.5 million Euro.

a) GE(1) is the Theil index, and GE(2) is half of the square of the coefficient of variation.

Source: HFCS (Second wave), Manager magazin (2014), own calculations.

Table 3: The distribution of household net wealth in France, first wave of the HFCS (2009/2010)

| Fractiles household net wealth | Database HFCS        |            |         | Database HFCS including imputed top wealth distribution |            |         |   |
|--------------------------------|----------------------|------------|---------|---------------------------------------------------------|------------|---------|---|
|                                | Percentile 1000 Euro | bill. Euro | Total % | Percentile 1000 Euro                                    | bill. Euro | Total % | % |
| 1st - 5th decile               | \                    | 351        | 5.4     | \                                                       | 351        | 4.8     |   |
| 6th decile                     | 116                  | 406        | 6.2     | 116                                                     | 406        | 5.5     |   |
| 7th decile                     | 175                  | 577        | 8.9     | 175                                                     | 577        | 7.9     |   |
| 8th decile                     | 237                  | 780        | 12.0    | 237                                                     | 780        | 10.7    |   |
| 9th decile                     | 329                  | 1,138      | 17.5    | 329                                                     | 1,142      | 15.6    |   |
| 10th decile                    | 511                  | 3,248      | 50.0    | 511                                                     | 4 064      | 55.5    |   |
| Total                          | \                    | 6 500      | 100.0   | \                                                       | 7,320      | 100.0   |   |
| Top 5%                         | 775                  | 2,375      | 36.5    | 800                                                     | 3,189      | 43.6    |   |
| Top 1%                         | 1,782                | 1,166      | 17.9    | 2,263                                                   | 1 822      | 24.9    |   |
| Top 0.1%                       | 6,959                | 458        | 7.0     | 9,970                                                   | 832        | 11.4    |   |
| Gini coefficient               |                      | 0.6751     |         |                                                         | 0.7101     |         |   |
| Entropy meas. <sup>(a)</sup>   |                      |            |         |                                                         |            |         |   |
| GE(1)                          |                      | 1.0226     |         |                                                         | 1.3919     |         |   |
| GE(2)                          |                      | 6.4762     |         |                                                         | 417.1204   |         |   |

Note: The imputation of the top wealth relies on the approach described in section 3. We use the 200 richest entries of the Challenges 2010 and assume a  $w_{min}$  of 0.5 million Euro.

a) GE(1) is the Theil index, and GE(2) is half of the square of the coefficient of variation.

Source: HFCS (First wave), Challenges (2010), own calculations.

Table 4: The distribution of household net wealth in France, second wave of the HFCS (2014/2015)

| Fractiles household net wealth | Database HFCS        |            |         | Database HFCS including imputed top wealth distribution |            |         |   |
|--------------------------------|----------------------|------------|---------|---------------------------------------------------------|------------|---------|---|
|                                | Percentile 1000 Euro | bill. Euro | Total % | Percentile 1000 Euro                                    | bill. Euro | Total % | % |
| 1st - 5th decile               | \                    | 439        | 6.3     | \                                                       | 455        | 5.0     |   |
| 6th decile                     | 113                  | 408        | 5.9     | 116                                                     | 420        | 4.6     |   |
| 7th decile                     | 170                  | 582        | 8.3     | 173                                                     | 599        | 6.6     |   |
| 8th decile                     | 235                  | 799        | 11.5    | 241                                                     | 830        | 9.2     |   |
| 9th decile                     | 331                  | 1,200      | 17.2    | 342                                                     | 1 267      | 14.0    |   |
| 10th decile                    | 536                  | 3,545      | 50.8    | 565                                                     | 5 490      | 60.6    |   |
| Total                          |                      | 6,973      | 100.0   |                                                         | 9,061      | 100.0   |   |
| Top 5%                         | 810                  | 2,612      | 37.5    | 917                                                     | 4,465      | 49.3    |   |
| Top 1%                         | 1 814                | 1,307      | 18.7    | 2,821                                                   | 2 769      | 30.6    |   |
| Top 0.1%                       | 7,660                | 512        | 7.3     | 14,084                                                  | 1 410      | 15.6    |   |
| Gini coefficient               |                      | 0.6737     |         |                                                         | 0.7365     |         |   |
| Entropy meas. <sup>(a)</sup>   |                      |            |         |                                                         |            |         |   |
| GE(1)                          |                      | 1.99       |         |                                                         | 1.7037     |         |   |
| GE(2)                          |                      | 5.5264     |         |                                                         | 794.9589   |         |   |

Note: The imputation of the top wealth relies on the approach described in section 3. We use the 200 richest entries of the Challenges 2015 and assume a  $w_{min}$  of 0.5 million Euro.

a) GE(1) is the Theil index, and GE(2) is half of the square of the coefficient of variation.

Source: HFCS (Second wave), Challenges (2015), own calculations.

Table 5: The distribution of household net wealth in Spain, First wave (2008/2009)

| Fractiles household net wealth | Database HFCS        |            |         |  | Database HFCS including imputed top wealth distribution |            |         |  |
|--------------------------------|----------------------|------------|---------|--|---------------------------------------------------------|------------|---------|--|
|                                | Percentile 1000 Euro | bill. Euro | Total % |  | Percentile 1000 Euro                                    | bill. Euro | Total % |  |
| 1st - 5th decile               | \                    | 643        | 13.0    |  | \                                                       | 643        | 11.3    |  |
| 6th decile                     | 183                  | 346        | 7.0     |  | 183                                                     | 346        | 6.1     |  |
| 7th decile                     | 228                  | 437        | 8.8     |  | 228                                                     | 437        | 7.7     |  |
| 8th decile                     | 289                  | 568        | 11.5    |  | 289                                                     | 568        | 10.0    |  |
| 9th decile                     | 387                  | 813        | 16.4    |  | 387                                                     | 816        | 14.3    |  |
| 10th decile                    | 608                  | 2,152      | 43.4    |  | 606                                                     | 2,887      | 50.7    |  |
| Total                          | \                    | 4,958      | 100.0   |  | \                                                       | 5,695      | 100.0   |  |
| Top 5%                         | 879                  | 1,532      | 30.9    |  | 942                                                     | 2,257      | 39.6    |  |
| Top 1%                         | 1,857                | 737        | 14.9    |  | 2,629                                                   | 1 280      | 22.5    |  |
| Top 0.1%                       | 7,453                | 295        | 6.0     |  | 11,415                                                  | 582        | 10.2    |  |
| Gini coefficient               |                      | 0.5724     |         |  |                                                         | 0.6254     |         |  |
| Entropy meas. <sup>a)</sup>    |                      |            |         |  |                                                         |            |         |  |
| GE(1)                          |                      | 0.7498     |         |  |                                                         | 1.1085     |         |  |
| GE(2)                          |                      | 8.1610     |         |  |                                                         | 132.1785   |         |  |

Note: The imputation of the top wealth relies on the approach described in section 3. We use the 74 entries of *el mundo* 2009 and assume a  $w_{min}$  of 0.5 million Euro.

Note: a)  $GE(1)$  is the Theil index, and  $GE(2)$  is half of the square of the coefficient of variation.

Source: HFCS (First wave), El Mundo (2009), own calculations.

Table 6: The distribution of household net wealth in Spain, Second wave (2011/2012)

| Fractiles household net wealth | Database HFCS        |            |         |  | Database HFCS including imputed top wealth distribution |            |         |  |
|--------------------------------|----------------------|------------|---------|--|---------------------------------------------------------|------------|---------|--|
|                                | Percentile 1000 Euro | bill. Euro | Total % |  | Percentile 1000 Euro                                    | bill. Euro | Total % |  |
| 1st - 5th decile               | \                    | 574        | 12.0    |  | \                                                       | 574        | 10.9    |  |
| 6th decile                     | 160                  | 316        | 6.6     |  | 160                                                     | 316        | 6.0     |  |
| 7th decile                     | 205                  | 406        | 8.5     |  | 205                                                     | 406        | 7.7     |  |
| 8th decile                     | 265                  | 539        | 11.3    |  | 265                                                     | 539        | 10.2    |  |
| 9th decile                     | 359                  | 760        | 15.9    |  | 359                                                     | 766        | 14.5    |  |
| 10th decile                    | 542                  | 2,173      | 45.6    |  | 554                                                     | 2 673      | 50.7    |  |
| Total                          | \                    | 4,768      | 100.0   |  | \                                                       | 5,274      | 100.0   |  |
| Top 5%                         | 864                  | 1,586      | 33.3    |  | 860                                                     | 2,084      | 39.5    |  |
| Top 1%                         | 1,860                | 779        | 16.3    |  | 2,386                                                   | 1,174      | 22.3    |  |
| Top 0.1%                       | 9,808                | 307        | 6.4     |  | 10,254                                                  | 528        | 10.0    |  |
| Gini coefficient               |                      | 0.5925     |         |  |                                                         | 0.6301     |         |  |
| Entropy meas. <sup>a)</sup>    |                      |            |         |  |                                                         |            |         |  |
| GE(1)                          |                      | 0.7965     |         |  |                                                         | 1.1295     |         |  |
| GE(2)                          |                      | 3.7212     |         |  |                                                         | 533.6497   |         |  |

Note: The imputation of the top wealth relies on the approach described in section 3. We use the 117 entries of *el mundo* 2012 and assume a  $w_{min}$  of 0.5 million Euro.

Note: a)  $GE(1)$  is the Theil index, and  $GE(2)$  is half of the square of the coefficient of variation.

Source: HFCS (Second wave), El Mundo (2012), own calculations.

Table 7: Gross wealth share of the top 1 percent for different sample choices and  $w_{min}$

| Country, wave | Excluding rich list |            |             | Including rich list |            |             |                               |            |             |            |            |             | Forbes     |            |             |
|---------------|---------------------|------------|-------------|---------------------|------------|-------------|-------------------------------|------------|-------------|------------|------------|-------------|------------|------------|-------------|
|               |                     |            |             | Top 100             |            |             | National rich list<br>Top 200 |            |             | Top 300    |            |             |            |            |             |
|               | $w_{min}$ (in Euro) |            |             |                     |            |             |                               |            |             |            |            |             |            |            |             |
|               | $\geq 2$ M          | $\geq 1$ M | $\geq .5$ M | $\geq 2$ M          | $\geq 1$ M | $\geq .5$ M | $\geq 2$ M                    | $\geq 1$ M | $\geq .5$ M | $\geq 2$ M | $\geq 1$ M | $\geq .5$ M | $\geq 2$ M | $\geq 1$ M | $\geq .5$ M |
| GERMANY, 1ST  | 20.8                | 22.1       | 24.2        | 28.8                | 32.8       | 32.9        | 33.0                          | 33.1       | 35.7        | 29.1       | 29.1       | 34.6        | 29.4       | 29.5       | 30.9        |
| GERMANY, 2ND  | 23.8                | 24.8       | 27.0        | 32.6                | 32.5       | 32.7        | 32.5                          | 32.4       | 32.6        | 31.9       | 31.7       | 31.8        | 29.8       | 34.3       | 32.7        |
| FRANCE, 1ST   | 16.9                | 17.0       | 16.0        | 22.4                | 24.9       | 23.9        | 21.3                          | 23.7       | 23.3        | 20.6       | 22.8       | 22.6        | 19.4       | 20.0       | 18.3        |
| FRANCE, 2ND   | 23.5                | 19.7       | 17.6        | 32.2                | 30.5       | 27.7        | 30.9                          | 29.9       | 28.0        | 29.9       | 29.1       | 27.7        | 30.0       | 27.3       | 24.1        |
| SPAIN, 1ST    | 14.3                | 15.0       | 13.7        | 19.4                | 22.2       | 20.9        | -                             | -          | -           | -          | -          | -           | 15.3       | 16.5       | 15.2        |
| SPAIN, 2ND    | 14.9                | 15.7       | 15.1        | 19.2                | 21.1       | 20.6        | -                             | -          | -           | -          | -          | -           | 17.1       | 18.0       | 17.2        |

*Note:* All underlying Pareto estimates rely on the regression method (OLS), as described in section 3.1, however, net wealth has been replaced by gross wealth. The HFCS top tail is replaced by synthetic households that follow the estimated Pareto distribution. The very end is replaced by the corresponding rich list (exempt for HFCS sample (excluding rich list)).

National rich list in Germany: manager magazin, in France: Challenges, and in Spain: El Mundo. The Top 100 in Spain contains 74 observations in the first, and 117 in the second wave.

*Source:* HFCS (both waves), Manager magazin (2011, 2014); Challenges (2010, 2015); El Mundo (2009, 2012) and Forbes (2011, 2014, 2010, 2015, 2009, 2012) own calculations.

## 4 Aggregate statistics on assets and liabilities

Table 8: Asset and liabilities of households in Germany according to national and financial accounts, 2010 (End-of-year level)

| ESA 2010  | Assets                                   | billion Euro | %     | ESA 2010 | Liabilities                                                                                 | billion Euro | %     |
|-----------|------------------------------------------|--------------|-------|----------|---------------------------------------------------------------------------------------------|--------------|-------|
|           | Non-financial assets <sup>a)</sup>       | 6,040        | 57.8  |          | Loans and other liabilities                                                                 | 1,520        | 14.5  |
| AN.111    | Dwellings                                | 3,483        | 33.3  | AF.41    | Short-term loans                                                                            | 75           | 0.7   |
| AN.112    | Other buildings and structures           | 413          | 4.0   | AF.42    | Long-term loans                                                                             | 1,434        | 13.7  |
| AN.113    | Machinery and equipment                  | 134          | 1.3   | AF.8     | Other liabilities                                                                           | 11           |       |
| AN.2111   | Land underlying buildings and structures | 1,775        | 17.0  |          |                                                                                             |              |       |
| AN.2112-9 | Land under cultivation, other land       | 212          | 2.0   |          |                                                                                             |              |       |
|           | Other non-financial assets <sup>b)</sup> | 23           | 0.2   |          |                                                                                             |              |       |
|           | Financial assets                         | 4,411        | 42.2  |          |                                                                                             |              |       |
| AF.21     | Currency                                 | 106          | 1.0   |          |                                                                                             |              |       |
| AF.22     | Transferable deposits                    | 694          | 6.6   |          |                                                                                             |              |       |
| AF.23     | Other deposits                           | 913          | 8.7   |          |                                                                                             |              |       |
| AF.3      | Debt securities                          | 219          | 2.1   |          |                                                                                             |              |       |
| AF.511    | Listed shares                            | 191          | 1.8   |          |                                                                                             |              |       |
| AF.512    | Unlisted shares                          | 46           | 0.4   |          |                                                                                             |              |       |
| AF.519    | Other equity                             | 184          | 1.8   |          |                                                                                             |              |       |
| AF.52     | Investment fund shares or units          | 396          | 3.8   |          |                                                                                             |              |       |
| AF.61     | Non-life insurance technical reserves    | 243          | 2.3   |          | Net wealth                                                                                  | 8,932        | 85.5  |
| AF.62     | Life insurance and annuity entitlements  | 765          | 7.3   |          | Net wealth less currency,<br>non-life insurance technical reserves,<br>pension entitlements | 7,969        | 76.2  |
| AF.63     | Pension entitlements                     | 614          | 5.9   |          |                                                                                             |              |       |
| AF.8      | Other financial assets                   | 39           | 0.4   |          |                                                                                             |              |       |
|           | Total                                    | 10,451       | 100.0 |          | Total                                                                                       | 10,451       | 100.0 |

Note: a) Including non-profit institutions serving households (NPIISH).

b) Cultivated assets and other natural resources, intellectual property products, inventories.

Source: Federal Statistical Office, national accounts; Deutsche Bundesbank, financial accounts.



Table 9: Asset and liabilities of households in Germany according to national and financial accounts, 2014 (End-of-year level)

| ESA 2010  | Assets                                   | billion Euro | %     | ESA 2010 | Liabilities                                                                                     | billion Euro | %     |
|-----------|------------------------------------------|--------------|-------|----------|-------------------------------------------------------------------------------------------------|--------------|-------|
|           | Non-financial assets <sup>a)</sup>       | 7,037        | 58.0  |          | Loans and other liabilities                                                                     | 1,587        | 13.1  |
| AN.111    | Dwellings                                | 4,047        | 33.4  | AF.41    | Short-term loans                                                                                | 65           | 0.5   |
| AN.112    | Other buildings and structures           | 436          | 3.6   | AF.42    | Long-term loans                                                                                 | 1,506        | 12.4  |
| AN.113    | Machinery and equipment                  | 141          | 1.2   | AF.8     | Other liabilities                                                                               | 17           |       |
| AN.2111   | Land underlying buildings and structures | 2,100        | 17.3  |          |                                                                                                 |              |       |
| AN.2112-9 | Land under cultivation, other land       | 286          | 2.4   |          |                                                                                                 |              |       |
|           | Other non-financial assets <sup>b)</sup> | 27           | 0.2   |          |                                                                                                 |              |       |
|           | Financial assets                         | 5,093        | 42.0  |          |                                                                                                 |              |       |
| AF.21     | Currency                                 | 128          | 1.1   |          |                                                                                                 |              |       |
| AF.22     | Transferable deposits                    | 981          | 8.1   |          |                                                                                                 |              |       |
| AF.23     | Other deposits                           | 889          | 7.3   |          |                                                                                                 |              |       |
| AF.3      | Debt securities                          | 162          | 1.3   |          |                                                                                                 |              |       |
| AF.511    | Listed shares                            | 234          | 1.9   |          |                                                                                                 |              |       |
| AF.512    | Unlisted shares                          | 69           | 0.6   |          |                                                                                                 |              |       |
| AF.519    | Other equity                             | 206          | 1.7   |          |                                                                                                 |              |       |
| AF.52     | Investment fund shares or units          | 443          | 3.6   |          |                                                                                                 |              |       |
| AF.61     | Non-life insurance technical reserves    | 307          | 2.5   |          | Net wealth                                                                                      | 10,542       | 86.9  |
| AF.62     | Life insurance and annuity entitlements  | 886          | 7.3   |          | Net wealth less currency,<br>non-life insurance technical reserves,<br>and pension entitlements | 9,355        | 77.1  |
| AF.63     | Pension entitlements                     | 752          | 6.2   |          |                                                                                                 |              |       |
| AF.8      | Other financial assets                   | 36           | 0.3   |          |                                                                                                 |              |       |
|           | Total                                    | 12,129       | 100.0 |          | Total                                                                                           | 12,129       | 100.0 |

Note: a) Including non-profit institutions serving households (NPISH).

b) Cultivated assets and other natural resources, intellectual property products, inventories.

Source: Federal Statistical Office, national accounts; Deutsche Bundesbank, financial accounts.

Table 10: Asset and liabilities of households in France according to national and financial accounts, 2010 (End-of-year level)

| ESA2010   | Assets                                   | billion Euro | %     | ESA2010 | Liabilities                                                                                      | billion Euro | %     |
|-----------|------------------------------------------|--------------|-------|---------|--------------------------------------------------------------------------------------------------|--------------|-------|
|           | Non-financial assets                     | 7,042        | 63.5  |         | Loans and other liabilities                                                                      | 1,323        | 11.9  |
| AN.111    | Dwellings                                | 3,076        | 27.7  | AF.4    | Loans                                                                                            | 1,057        | 9.5   |
| AN.112    | Other buildings and structures           | 150          | 1.4   | AF.8    | Other liabilities                                                                                | 266          | 2.4   |
| AN.113    | Machinery and equipment                  | 43           | 0.4   |         |                                                                                                  |              |       |
| AN.2111   | Land underlying buildings and structures | 3,164        | 28.5  |         |                                                                                                  |              |       |
| AN.2112-9 | Land under cultivation, other land       | 430          | 3.9   |         |                                                                                                  |              |       |
|           | Other non-financial assets <sup>a)</sup> | 179          | 1.6   |         |                                                                                                  |              |       |
|           | Financial assets                         | 4,043        | 36.5  |         |                                                                                                  |              |       |
| AF.21     | Currency                                 | 49           | 0.4   |         |                                                                                                  |              |       |
| AF.22     | Transferable deposits                    | 288          | 2.6   |         |                                                                                                  |              |       |
| AF.29     | Other deposits                           | 773          | 7.0   |         |                                                                                                  |              |       |
| AF.3      | Debt securities                          | 77           | 0.7   |         |                                                                                                  |              |       |
| AF.4      | Loans                                    | 25           | 0.2   |         |                                                                                                  |              |       |
| AF.511    | Listed shares                            | 160          | 1.4   |         |                                                                                                  |              |       |
| AF.512    | Unlisted shares                          | 330          | 3.0   |         |                                                                                                  |              |       |
| AF.519    | Other equity                             | 306          | 2.8   |         |                                                                                                  |              |       |
| AF.52     | Investment fund shares or units          | 257          | 2.3   |         |                                                                                                  |              |       |
| AF.61     | Non-life insurance technical reserves    | 87           | 0.8   |         | Net wealth                                                                                       | 9,763        | 88.1  |
| AF.62     | Life insurance and annuity entitlements  | 1,249        | 11.3  |         | Net wealth, less currency,<br>non-life insurance technical reserves,<br>and pension entitlements | 9,463        | 85.4  |
| AF.63     | Pension entitlements                     | 164          | 1.5   |         |                                                                                                  |              |       |
| AF.8      | Other financial assets                   | 277          | 2.5   |         |                                                                                                  |              |       |
|           | Total                                    | 11,085       | 100.0 |         | Total                                                                                            | 11,085       | 100.0 |

Note: a) Cultivated assets and other natural resources, intellectual property products, inventories.

Source: INSEE, national accounts; Banque de France and European Central Bank, financial accounts.

Table 11: Asset and liabilities of households in France according to national and financial accounts, 2014 (End-of-year level)

| ESA2010   | Assets                                   | billion Euro | %     | ESA2010 | Liabilities                                                                                     | billion Euro | %     |
|-----------|------------------------------------------|--------------|-------|---------|-------------------------------------------------------------------------------------------------|--------------|-------|
|           | Non-financial assets                     | 7,141        | 61.1  |         | Loans and other liabilities                                                                     | 1,354        | 11.6  |
| AN.111    | Dwellings                                | 3,435        | 29.4  | AF.4    | Loans                                                                                           | 1,178        | 10.1  |
| AN.112    | Other buildings and structures           | 147          | 1.3   | AF.8    | Other liabilities                                                                               | 176          | 1.5   |
| AN.113    | Machinery and equipment                  | 37           | 0.3   |         |                                                                                                 |              |       |
| AN.2111   | Land underlying buildings and structures | 2,907        | 24.9  |         |                                                                                                 |              |       |
| AN.2112-9 | Land under cultivation, other land       | 441          | 3.8   |         |                                                                                                 |              |       |
|           | Other non-financial assets <sup>a)</sup> | 175          | 1.5   |         |                                                                                                 |              |       |
|           | Financial assets                         | 4,538        | 38.9  |         |                                                                                                 |              |       |
| AF.21     | Currency                                 | 65           | 0.6   |         |                                                                                                 |              |       |
| AF.22     | Transferable deposits                    | 319          | 2.7   |         |                                                                                                 |              |       |
| AF.29     | Other deposits                           | 888          | 7.6   |         |                                                                                                 |              |       |
| AF.3      | Debt securities                          | 77           | 0.7   |         |                                                                                                 |              |       |
| AF.4      | Loans                                    | 31           | 0.3   |         |                                                                                                 |              |       |
| AF.511    | Listed shares                            | 189          | 1.6   |         |                                                                                                 |              |       |
| AF.512    | Unlisted shares                          | 373          | 3.2   |         |                                                                                                 |              |       |
| AF.519    | Other equity                             | 366          | 3.1   |         |                                                                                                 |              |       |
| AF.52     | Investment fund shares or units          | 291          | 2.5   |         |                                                                                                 |              |       |
| AF.61     | Non-life insurance technical reserves    | 109          | 0.9   |         | Net wealth                                                                                      | 10,326       | 88.4  |
| AF.62     | Life insurance and annuity entitlements  | 1,415        | 12.1  |         | Net wealth less currency,<br>non-life insurance technical reserves,<br>and pension entitlements | 9,964        | 85.3  |
| AF.63     | Pension entitlements                     | 188          | 1.6   |         |                                                                                                 |              |       |
| AF.8      | Other financial assets                   | 228          | 2.0   |         |                                                                                                 |              |       |
|           | Total                                    | 11,680       | 100.0 |         | Total                                                                                           | 11,680       | 100.0 |

Note: a) Cultivated assets and other natural resources, intellectual property products, inventories.  
Source: INSEE, national accounts; Banque de France and European Central Bank, financial accounts.

Table 12: Asset and liabilities of households in Spain according to national and financial accounts, 2009 (End-of-year level)

| ESA 2010 | Assets                                  | billion Euro | %     | ESA 2010 | Liabilities                                                                               | billion Euro | %     |
|----------|-----------------------------------------|--------------|-------|----------|-------------------------------------------------------------------------------------------|--------------|-------|
|          | Non-financial assets <sup>a)</sup>      | 5 884        | 77.5  |          | Loans and other liabilities                                                               | 942          | 12.4  |
|          | Financial assets                        | 1 711        | 22.5  | AF4      | Loans                                                                                     | 901          | 11.9  |
| AF21     | Currency                                | 92           | 1.2   | AF8      | Other liabilities                                                                         | 41           | 0.5   |
| AF22     | Transferable deposits                   | 300          | 3.9   |          |                                                                                           |              |       |
| AF29     | Other deposits                          | 408          | 5.4   |          |                                                                                           |              |       |
| AF3      | Debt securities                         | 39           | 0.5   |          |                                                                                           |              |       |
| AF511    | Listed shares                           | 104          | 1.4   |          |                                                                                           |              |       |
| AF512    | Unlisted shares                         | 253          | 3.3   |          |                                                                                           |              |       |
| AF519    | Other equity                            | 45           | 0.6   |          |                                                                                           |              |       |
| AF52     | Investment fund shares or units         | 151          | 2.0   |          |                                                                                           |              |       |
| AF61     | Non-life insurance technical reserves   | 24           | 0.3   |          | Net wealth                                                                                | 6 653        | 87.6  |
| AF62     | Life insurance and annuity entitlements | 110          | 1.4   |          | Net wealth less currency, non-life insurance technical reserves, and pension entitlements | 6 394        | 84.2  |
| AF63     | Pension entitlements                    | 143          | 1.9   |          |                                                                                           |              |       |
| AF8      | Other financial assets                  | 42           | 0.6   |          |                                                                                           |              |       |
|          | Total                                   | 7 595        | 100.0 |          | Total                                                                                     | 7 595        | 100.0 |

Note: a) Only real estate assets. Including non-profit institutions serving households (NPISH).

Source: Banco de España and European Central Bank, financial accounts; estimation on real estate assets by Banco de España.

Table 13: Asset and liabilities of households in Spain according to national and financial accounts, 2011 (End-of-year level)

| ESA 2010 | Assets                                  | billion Euro | %     | ESA 2010 | Liabilities                                                                                    | billion Euro | %     |
|----------|-----------------------------------------|--------------|-------|----------|------------------------------------------------------------------------------------------------|--------------|-------|
|          | Non-financial assets <sup>a)</sup>      | 5,208        | 74.7  |          | Loans and other liabilities                                                                    | 918          | 13.2  |
|          | Financial assets                        | 1,761        | 25.3  | AF.4     | Loans                                                                                          | 868          | 12.5  |
| AF.21    | Currency                                | 89           | 1.3   | AF.8     | Other liabilities                                                                              | 50           | 0.7   |
| AF.22    | Transferable deposits                   | 299          | 4.3   |          |                                                                                                |              |       |
| AF.29    | Other deposits                          | 434          | 6.2   |          |                                                                                                |              |       |
| AF.3     | Debt securities                         | 82           | 1.2   |          |                                                                                                |              |       |
| AF.511   | Listed shares                           | 90           | 1.3   |          |                                                                                                |              |       |
| AF.512   | Unlisted shares                         | 237          | 3.4   |          |                                                                                                |              |       |
| AF.519   | Other equity                            | 83           | 1.2   |          |                                                                                                |              |       |
| AF.52    | Investment fund shares or units         | 121          | 1.7   |          |                                                                                                |              |       |
| AF.61    | Non-life insurance technical reserves   | 19           | 0.3   |          | Net wealth                                                                                     | 6,051        | 86.8  |
| AF.62    | Life insurance and annuity entitlements | 116          | 1.7   |          | Net wealth less currency,<br>non-life insurance technical reserves<br>and pension entitlements | 5,805        | 83.3  |
| AF.63    | Pension entitlements                    | 139          | 2.0   |          |                                                                                                |              |       |
| AF.8     | Other financial assets                  | 52           | 0.8   |          |                                                                                                |              |       |
|          | Total                                   | 6,969        | 100.0 |          | Total                                                                                          | 6,969        | 100.0 |

Note: a) Only real estate assets. Including non-profit institutions serving households (NPIH).

Source: Banco de España and European Central Bank, financial accounts; estimation on real estate assets by Banco de España.

## 5 Construction of an adjusted micro data base for the wealth top tail

In our paper, we replace the HFCS wealth top tail by imputed households that follow the Pareto distribution. The very end of the top tail we replace by observations from rich lists, given that these lists provide an empirical estimate for the very top. In this section, we describe the different steps of how we constructed this adjusted top tail. First of all, it is helpful to recall the characteristics of the Pareto distribution: The probability density function of the Pareto distribution is defined on the wealth interval  $[w_{min}; \infty[$  as

$$f(w) = \frac{\alpha w_{min}^\alpha}{w^{\alpha+1}}; \alpha > 0, \quad (1)$$

$\alpha$  being the slope parameter and  $w_{min}$  the minimum wealth which determines the lower bound of the top tail. When representing the top tail of the wealth distribution by the Pareto distribution, we can calculate total tail wealth as

$$\int_{w_{min}}^{\infty} f(w) w N_{tt} dw = \int_{w_{min}}^{\infty} \alpha N_{tt} \left(\frac{w_{min}}{w}\right)^\alpha dw \quad (2)$$

$N_{tt}$  being the top tail population, measured by the sum of weighted households in the HFCS with a net worth of  $w_{min}$  or higher.

In the following, we outline the different steps to derive the adjusted wealth top tail based on actual micro data.

1. Create a dataset with  $z$  observations (households) whose net wealth increases on a logarithm scale up to ' $\infty$ ', where the first household has net wealth higher than  $w_{min}$ . In this paper, we approximate  $\infty$  by 200 billion Euros which is equivalent to  $w_z$ , net wealth of observation  $z$ .<sup>1</sup>
2. For each interval between two observations in the wealth distribution  $[w_{i-1}, w_i]$ , calculate the number of households,  $IH_i$ , which falls into that interval as

$$IH_i = \int_{w_{i-1}}^{w_i} N_{tt} f(w) dw; i = 1, \dots, z \text{ and } w_0 = w_{min}. \quad (3)$$

We index  $IH$  by  $i$ , as it will serve as weight for household  $i$  in the adjusted top tail.

3. For each interval between two observations in the wealth distribution  $[w_{i-1}, w_i]$ , calculate total net wealth,  $IW_i$ , according to the Pareto distribution:

$$IW_i = \int_{w_{i-1}}^{w_i} f(w) w N_{tt} dw = \int_{w_{i-1}}^{w_i} \alpha N_{tt} \left(\frac{w_{min}}{w}\right)^\alpha dw; i = 1, \dots, z \text{ and } w_0 = w_{min}. \quad (4)$$

4. Calculate the final net wealth of each household,  $w^*_i$ , which falls in the wealth interval  $[w_{i-1}, w_i]$  such that

$$w^*_i IH_i = IW_i \quad (5)$$

and

$$w^*_i = \frac{IW_i}{IH_i} \quad (6)$$

where  $w^*_i > w_i$  and  $w^*_i < w_{i+1}$ . As a result, the weighted sum of top tail household net wealth,  $w^*_i$ , matches the sum calculated according to formula 2, given that ' $\infty$ ' is approximated by the same number, here 200 billion Euros.

---

<sup>1</sup>The choice of the proxy for ' $\infty$ ', e.g. 200 billion Euros, has an impact on the estimate of total net wealth. Increasing the proxy for  $\infty$  for any given  $\alpha$ ,  $w_{min}$ , and  $N_{tt}$  shrinks the difference between total tail wealth - calculated according to equation 2 and replacing  $\infty$  by the proxy - and its theoretical expected value (calculated as  $N_{tt} w_{min} \frac{\alpha}{\alpha-1}$  (Vermeulen, 2016, p.15)). For instance, when setting  $\infty$  to 5 trillion Euros the two calculations yield almost the same result. However, given that in reality, there is no household with net wealth of infinity, we are confident that approximating  $\infty$  by a lower net wealth value, based on the rich list, is the appropriate approach.

5. Finally, replace the very end of this new discrete top tail Pareto distribution by the rich list, where each entry has a weight of one. Accordingly, we calculate total top tail wealth in our micro data as

$$Total\ tail\ wealth = \sum_i^m w *_{i} IH_i + \sum_{j=1}^R w_j; i = 1, \dots, m j = 1, \dots, R, \quad (7)$$

where  $m$  is the richest household in the imputed top tail which has net wealth below the net wealth of the poorest rich list entry and  $R$  is the number of rich list entries.

## References

- Challenges (2010). Les 500 plus grandes fortunes professionnelles de France. Challenges 220.
- Challenges (2015). Les 500 plus grandes fortunes professionnelles de France. Challenges 441.
- El Mundo (2009). Los 100 mas ricos de España. El mundo magazine 532.
- El Mundo (2012). Los 200 Ricos de España. El mundo magazine 691.
- Forbes (2009). The World's Billionaires 2009. The World's Billionaires 2009.
- Forbes (2010). The World's Billionaires 2010. The World's Billionaires 2010.
- Forbes (2011). The World's Billionaires 2011. The World's Billionaires 2011.
- Forbes (2012). The World's Billionaires 2012. The World's Billionaires 2012.
- Forbes (2014). The World's Billionaires 2014. The World's Billionaires 2014.
- Forbes (2015). The World's Billionaires 2015. The World's Billionaires 2015.
- Manager magazin (2011). Die 500 reichsten Deutschen (The 500 richest Germans). manager magazin spezial, Oktober 2011.
- Manager magazin (2014). Die 500 reichsten Deutschen (The 500 richest Germans). manager magazin spezial, Oktober 2014.
- Vermeulen, P. (2016). Estimating the top tail of the wealth distribution. Working Paper Series 1907, European Central Bank.
